# Supplementary material for: Novel haloarchaeon Natrinema thermophila having the highest growth temperature among haloarchaea with a large genome size
Source: PubMed Central journal article supplement (PMC5958107; doi:10.1038/s41598-018-25887-7), 2018-05-17
Supplement: 41598_2018_25887_MOESM1_ESM.pdf [file 41598_2018_25887_MOESM1_ESM.pdf]

1 **Supplementary Information**

2

3 **Novel haloarchaeon *Natrinema thermophila* having the highest growth temperature**  
4 **among haloarchaea with a large genome size**

5

6 Yeon Bee Kim, Joon Yong Kim, Hye Seon Song, Changsu Lee, Seung Woo Ahn, Se Hee Lee,  
7 Min Young Jung, Jin-Kyu Rhee, Juseok Kim, Dong-Wook Hyun, Jin-Woo Bae and Seong  
8 Woon Roh

9

10

11 *Polyphasic taxonomic analysis*

12 Strain CBA1119<sup>T</sup> was coccoid and 0.9–1.0 µm in size, and grew at an NaCl concentration of  
13 10%–30% (w/v) and at pH 7–9 and a temperature of 20 °C–66 °C. Optimum growth was  
14 observed at 20%–25% (w/v) of NaCl, pH 7–8, and 50 °C–55 °C. Mg<sup>2+</sup> was not required for  
15 growth. Under anaerobic conditions, no growth occurred in the presence of L-arginine,  
16 trimethylamine-N-oxide (TMAO), dimethylsulfoxide (DMSO), or nitrate. Strain CBA1119<sup>T</sup>  
17 was positive for catalase and oxidase activities and for hydrolysis of starch, Tween 40, and  
18 Tween 80, but was negative for the hydrolysis of casein. Strain CBA1119<sup>T</sup> was sensitive to  
19 rifampicin but not to cycloheximide, erythromycin, kanamycin, nalidixic acid, streptomycin,  
20 or vancomycin. Detailed characteristics are summarized in Supplementary Table S1 and the  
21 species description below. The major polar lipids of strain CBA1119<sup>T</sup> were  
22 phosphatidylglycerol (PG), phosphatidylglycerol phosphate methyl ester (PGP-Me),  
23 phosphatidylglycerol sulfate (PGS), unidentified phospholipid (PL), unidentified glycolipids  
24 (GL1 and GL2) and unidentified lipid (L1) (Supplementary Figure S1). Strain CBA1119<sup>T</sup> had  
25 98.8% of 16S rRNA gene sequence similarities with *Natrinema soli* 5-3<sup>T</sup>, 97.1–97.2% with

26 *Nnm. salaciae* MDB25<sup>T</sup>, and 97.0% with *Nnm. ejinorensis* EJ-57<sup>T</sup>, followed by < 97% with  
27 other haloarchaeal members. DNA-DNA hybridization (DDH) values between strain  
28 CBA1119<sup>T</sup> and the reference strains: *Natrinema soli* LMG 29247<sup>T</sup>, *Nnm. salaciae* JCM 17869<sup>T</sup>  
29 and *Nnm. ejinorensis* JCM 13890<sup>T</sup>, were 37.0%, 30.6% and 23.4%, respectively. The low DDH  
30 value (< 70%)<sup>1</sup> indicated that strain CBA1119<sup>T</sup> is a distinct species within the genus *Natrinema*.  
31 It is known that the genera *Natrinema* and *Haloterrigena* show a very close relationship as not  
32 forming each monophyletic group at the genus level in phylogenetic trees<sup>2-5</sup>. The phylogenetic  
33 tree based on 16S rRNA gene similarities showed that strain CBA1119<sup>T</sup> clustered tightly with  
34 the type strain of *Natrinema soli*, implying that strain CBA1119<sup>T</sup> is more closely related to the  
35 member in the genus *Natrinema* than other genus members (Supplementary Figure S2a). The  
36 polyphasic taxonomic data indicate that strain CBA1119<sup>T</sup> represents a novel species of the  
37 genus *Natrinema*, for which the name *Natrinema thermophila* is proposed.

38

39 *Description of Natrinema thermophila* sp. nov.

40 *Natrinema thermophila* (ther.mo'phi.la. Gr. n. *thermê* heat; N.L. fem. adj. *phila* (from Gr. fem.  
41 adj. *philê*) loving; N.L. fem. adj. *thermophila* heat-loving organism).

42 The cells were coccoid in shape and Gram-negative. Colonies were orange when grown in  
43 DBCM2 medium. Growth occurred at 20 °C–66 °C (optimum, 50 °C–55 °C), with 10%–30%  
44 (w/v) NaCl (optimum, 20%–25%), and at pH 7–9 (optimum, pH 7–8). Mg<sup>2+</sup> was not required  
45 for growth. Strain CBA1119<sup>T</sup> did not grow anaerobically in the presence of nitrate, L-arginine,  
46 DMSO, or TMAO, and was catalase- and oxidase-positive. The strain was positive for  
47 hydrolysis of starch, Tween 40, and Tween 80 and negative for hydrolysis of casein. D-Sorbitol,  
48 fumarate, glycerol, L-glutamate, L-malate, pyruvate, starch, succinate, and sucrose were  
49 utilized as sole sources of carbon and energy, while D-fructose, D-galactose, D-mannitol, D-  
50 mannose, D-xylose, D-maltose, L-alanine, L-arginine, L-aspartate, L-lysine, and L-sorbose were

51 not. The major polar lipids were phosphatidylglycerol phosphate methyl ester and  
52 phosphatidylglycerol sulfate, and the G+C content was 62.27 mol%. The type strain was  
53 CBA1119<sup>T</sup> (= KCCM 43222<sup>T</sup> = JCM 30478<sup>T</sup>), which was isolated from solar salt from a salt  
54 field in the Republic of Korea.

55

#### 56 *General genomic features of strain CBA1119<sup>T</sup>*

57 The genome of strain CBA1119<sup>T</sup> comprised nine contigs that were 5 058 058 bp long with a  
58 G+C content of 62.27 mol%; one of the contigs was a chromosome that was 4 087 412 bp long  
59 and had a G+C content of 63.4 mol%. The genome had 5 122 open reading frames, 10 rRNA  
60 genes (three 16S, three 23S, and four 5S rRNA), and 49 tRNA genes. A total of 4 482 genes  
61 were annotated to Clusters of Orthologous Groups (COG); among them, 2 508 were matched  
62 to these 16 functional categories as shown in Supplementary Table S2. Additionally, 1 974  
63 genes were matched to the S (function unknown) category. The range of OrthoANI values  
64 between strain CBA1119<sup>T</sup> and other type strains of the genus *Natrinema* was 81.93%–82.94%  
65 (Supplementary Table S3). The phylogenetic tree constructed from these values indicated that  
66 strain CBA1119<sup>T</sup> was located as an outgroup (Supplementary Figure S2b). Members of the  
67 genus *Natrinema* were identified as non-human pathogens using PathogenFinder v.1.1 and had  
68 no antimicrobial resistance genes based on ResFinder v.2.1.

69

70 **Supplementary Table S1.** Differences in characteristics of strain CBA1119<sup>T</sup> and related  
 71 species<sup>†</sup>.

| Characteristic                | 1         | 2       | 3           | 4           |
|-------------------------------|-----------|---------|-------------|-------------|
| Cell morphology               | Cocci     | Oval    | Pleomorphic | Pleomorphic |
| NaCl optimum (% [w/v])        | 20.0–25.0 | 23.4    | 15.2–19.9   | 19.9        |
| MgCl <sub>2</sub> requirement | –         | –       | –           | –           |
| Temperature for growth        |           |         |             |             |
| Range (°C)                    | 20–66     | 25–45   | 30–52.5     | 25–50       |
| Optimum (°C)                  | 50–55     | 40      | 45          | 37          |
| pH for growth                 |           |         |             |             |
| Range                         | 7.0–9.0   | 6.0–8.0 | 6.5–9.0     | 6.0–8.5     |
| Optimum                       | 7.0–8.0   | 7.0     | 7.0–8.0     | 7.0         |
| Anaerobic growth of nitrate   | –         | –       | +           | –           |
| Hydrolysis                    |           |         |             |             |
| Starch                        | +         | –       | +           | +           |
| Casein                        | –         | –       | +           | +           |
| Tween 80                      | +         | +       | –           | –           |
| Assimilation                  |           |         |             |             |
| D-Sorbitol                    | +         | +       | –           | –           |
| D-Maltose                     | –         | +       | +           | +           |
| Glycerol                      | +         | +       | –           | –*          |
| L-Alanine                     | –         | +*      | +           | +           |
| L-Arginine                    | –         | +*      | +           | +           |

|                        |       |      |      |      |
|------------------------|-------|------|------|------|
| L-Aspartate            | –     | +    | +    | +    |
| L-Lysine               | –     | +*   | +    | +    |
| Acid production from   |       |      |      |      |
| Starch                 | –     | –    | +    | +    |
| Sucrose                | –     | +*   | +    | –    |
| DNA G+C content (mol%) | 62.27 | 61.5 | 64.6 | 64.7 |

72 Taxa: 1, *Natrinema thermophila* CBA1119<sup>T</sup> sp. nov.; 2, *Nnm. soli* LMG 29247<sup>T4</sup>; 3, *Nnm.*  
73 *salaciae* JCM 17869<sup>T2</sup>; 4, *Nnm. ejinorensis* JCM 13890<sup>T6</sup>.

74 †Based on the data from this study, strain CBA1119<sup>T</sup>, *Nnm. soli* LMG 29247<sup>T</sup>, *Nnm. salaciae*  
75 JCM 17869<sup>T</sup>, and *Nnm. ejinorensis* JCM 13890<sup>T</sup> all utilize fumarate, pyruvate, starch, succinate,  
76 sucrose, L-glutamate, and L-malate and could not utilize D-fructose, D-galactose, D-mannitol,  
77 D-mannose, and D-xylose. None of the strains produced acid from fumarate, succinate, L-  
78 glutamate, or L-malate. +, Positive; –, negative. Hydrolysis test, single carbon source  
79 assimilation, and acid production data are from this study.

80 \*Opposite results were reported by original studies.

81

82 **Supplementary Table S2.** Genes associated with general COG functional categories in the  
 83 genome of *Natrinema thermophila* CBA1119<sup>T</sup>.

| <b>COG</b>   | <b>Description of function</b>                               | <b>Number of genes</b> | <b>Ratio</b> |
|--------------|--------------------------------------------------------------|------------------------|--------------|
| J            | Translation, ribosomal structure and biogenesis              | 161                    | 3.59%        |
| K            | Transcription                                                | 237                    | 5.29%        |
| L            | Replication, recombination and repair                        | 318                    | 7.10%        |
| D            | Cell cycle control, cell division, chromosome partitioning   | 21                     | 0.47%        |
| O            | Posttranslational modification, protein turnover, chaperones | 132                    | 2.95%        |
| M            | Cell wall/membrane/envelope biogenesis                       | 114                    | 2.54%        |
| N            | Cell motility                                                | 17                     | 0.38%        |
| P            | Inorganic ion transport and metabolism                       | 229                    | 5.11%        |
| T            | Signal transduction mechanisms                               | 151                    | 3.37%        |
| C            | Energy production and conversion                             | 273                    | 6.09%        |
| G            | Carbohydrate transport and metabolism                        | 118                    | 2.63%        |
| E            | Amino acid transport and metabolism                          | 282                    | 6.29%        |
| F            | Nucleotide transport and metabolism                          | 77                     | 1.72%        |
| H            | Coenzyme transport and metabolism                            | 126                    | 2.81%        |
| I            | Lipid transport and metabolism                               | 179                    | 3.99%        |
| Q            | Secondary metabolites biosynthesis, transport and catabolism | 73                     | 1.63%        |
| R            | General function prediction only                             | 0                      | 0.00%        |
| S            | Function unknown                                             | 1 974                  | 44.04%       |
| <b>Total</b> |                                                              | <b>4 482</b>           | <b>100%</b>  |

85 **Supplementary Table S3.** OrthoANI values between type strains in the genus *Natrinema*<sup>†</sup>.

| Strains | 1      | 2      | 3      | 4      | 5      | 6      | 7      | 8      |
|---------|--------|--------|--------|--------|--------|--------|--------|--------|
| 1       | 100.00 | 82.93  | 82.47  | 82.09  | 82.80  | 82.94  | 82.68  | 81.93  |
| 2       | 82.93  | 100.00 | 83.82  | 82.98  | 83.61  | 83.47  | 83.39  | 82.31  |
| 3       | 82.47  | 83.82  | 100.00 | 83.61  | 84.22  | 83.20  | 83.60  | 82.22  |
| 4       | 82.09  | 82.98  | 83.61  | 100.00 | 92.79  | 83.15  | 91.79  | 83.01  |
| 5       | 82.80  | 83.61  | 84.22  | 92.79  | 100.00 | 83.84  | 93.01  | 83.19  |
| 6       | 82.94  | 83.47  | 83.20  | 83.15  | 83.84  | 100.00 | 83.28  | 82.94  |
| 7       | 82.68  | 83.39  | 83.60  | 91.79  | 93.01  | 83.28  | 100.00 | 83.52  |
| 8       | 81.93  | 82.31  | 82.22  | 83.01  | 83.19  | 82.94  | 83.52  | 100.00 |

86 Taxa: 1, *Natrinema thermophila* CBA1119<sup>T</sup> (PDBS000000000); 2, *Nnm. salaciae* JCM 17869<sup>T</sup>  
87 (FOFD000000000); 3, *Nnm. ejinorensis* JCM 13890<sup>T</sup> (NXNI000000000); 4, *Nnm. gari* JCM  
88 14663<sup>T</sup> (AOIJ000000000); 5, *Nnm. altunense* AJ2<sup>T</sup> (JNCS000000000); 6, *Nnm. versiforme* JCM  
89 10478<sup>T</sup> (AOID000000000); 7, *Nnm. pallidum* DSM 3751<sup>T</sup> (AOII000000000); 8, *Nnm.*  
90 *pellirubrum* DSM 15624<sup>T</sup> (CP003372).

91 <sup>†</sup>Based on these results, OrthoANI values between strain CBA1119<sup>T</sup> and other *Natrinema* type  
92 strains were in the range of 81.93%–82.94%.

93 **Supplementary Table S4.** Type strains used for genome size and growth temperature comparisons. Information on the strains was obtained  
 94 from the NCBI database and previous studies.

| Family                  | Species                                | Strain        | Assembly accession number | Size (Mb) | Optimal temperature (°C) | Maximum temperature (°C) | Reference for growth temperature data |
|-------------------------|----------------------------------------|---------------|---------------------------|-----------|--------------------------|--------------------------|---------------------------------------|
| <i>Haloarculaceae</i>   | <i>Halapricum salinum</i>              | CBA1105       | GCA_000755225.1           | 3.45149   | 37                       | 45                       | 7                                     |
| <i>Haloarculaceae</i>   | <i>Haloarcula amylolytica</i>          | JCM 13557     | GCA_000336615.1           | 4.22542   | 41                       | 52                       | 8                                     |
| <i>Haloarculaceae</i>   | <i>Haloarcula argentinensis</i>        | DSM12282      | GCA_000336895.1           | 4.14711   | 40                       | ND                       | 9                                     |
| <i>Haloarculaceae</i>   | <i>Haloarcula hispanica</i>            | CGMCC 1.2049  | GCA_000223905.1           | 3.89000   | 40                       | 50                       | 10                                    |
| <i>Haloarculaceae</i>   | <i>Haloarcula japonica</i>             | DSM 6131      | GCA_000336635.1           | 4.28036   | 45                       | 45                       | 11                                    |
| <i>Haloarculaceae</i>   | <i>Haloarcula marismortui</i>          | ATCC 43049    | GCA_000011085.1           | 4.27464   | 50                       | ND                       | 12                                    |
| <i>Haloarculaceae</i>   | <i>Haloarcula vallismortis</i>         | DSM 3756      | GCA_900106715.1           | 3.89664   | 49                       | 55                       | 13                                    |
| <i>Haloarculaceae</i>   | <i>Halomicrobium katesii</i>           | DSM 19301     | GCA_000379085.1           | 3.60777   | 40                       | 50                       | 14                                    |
| <i>Haloarculaceae</i>   | <i>Halomicrobium mukohataei</i>        | DSM 12286     | GCA_000023965.1           | 3.33235   | 45                       | 52                       | 15                                    |
| <i>Haloarculaceae</i>   | <i>Halomicrobium zhouii</i>            | CGMCC 1.10457 | GCA_900114435.1           | 4.25033   | 42                       | 55                       | 16                                    |
| <i>Haloarculaceae</i>   | <i>Halorhabdus tiamatea</i>            | SARL4B        | GCA_000470655.1           | 3.14616   | 45                       | 55                       | 17                                    |
| <i>Haloarculaceae</i>   | <i>Halorhabdus utahensis</i>           | DSM 12940     | GCA_000023945.1           | 3.11680   | 50                       | 55                       | 18                                    |
| <i>Haloarculaceae</i>   | <i>Halorientalis persicus</i>          | IBRC-M 10043  | GCA_900110215.1           | 4.86976   | 40                       | 50                       | 19                                    |
| <i>Haloarculaceae</i>   | <i>Halosimplex carlsbadense</i>        | 2-9-1         | GCA_000337455.1           | 4.69489   | 40                       | 50                       | 20                                    |
| <i>Halobacteriaceae</i> | <i>Haladaptatus cibarius</i>           | D43           | GCA_000710615.1           | 3.92672   | 37                       | 50                       | 21                                    |
| <i>Halobacteriaceae</i> | <i>Haladaptatus litoreus</i>           | CGMCC 1.7737  | GCA_900156425.1           | 4.67171   | 40                       | 55                       | 22                                    |
| <i>Halobacteriaceae</i> | <i>Haladaptatus paucihalophilus</i>    | DX253         | GCA_000376445.1           | 4.31754   | 30                       | 45                       | 23                                    |
| <i>Halobacteriaceae</i> | <i>Halalkalicoccus jeotgali</i>        | B3            | GCA_000196895.1           | 3.69865   | 45                       | 50                       | 24                                    |
| <i>Halobacteriaceae</i> | <i>Halalkalicoccus paucihalophilus</i> | DSM 24557     | GCA_001593955.1           | 3.98041   | 37                       | 50                       | 25                                    |
| <i>Halobacteriaceae</i> | <i>Halarchaeum acidiphilum</i>         | JCM 16109     | GCA_000474235.1           | 2.62897   | 37                       | 45                       | 26                                    |
| <i>Halobacteriaceae</i> | <i>Haloarchaeobius iranensis</i>       | KCTC 4048     | GCA_900103505.1           | 3.76861   | 40                       | 55                       | 27                                    |



|                         |                                      |               |                 |         |    |    |       |
|-------------------------|--------------------------------------|---------------|-----------------|---------|----|----|-------|
| <i>Halobacteriaceae</i> | <i>Halobacterium jilantaiense</i>    | CGMCC 1.5337  | GCA_900110535.1 | 2.95279 | 40 | 55 | 28    |
| <i>Halobacteriaceae</i> | <i>Halodesulfurarchaeum formicum</i> | HSR6          | GCA_001886955.1 | 2.08595 | 37 | 50 | 29    |
| <i>Halobacteriaceae</i> | <i>Halovenus aranensis</i>           | IBRC-M 10015  | GCA_900100385.1 | 3.28712 | 40 | 50 | 30    |
| <i>Halobacteriaceae</i> | <i>Natronomonas moolapensis</i>      | 8.8.11        | GCA_000591055.1 | 2.91257 | 40 | 45 | 31    |
| <i>Halobacteriaceae</i> | <i>Natronomonas pharaonis</i>        | DSM 2160      | GCA_000026045.1 | 2.74970 | 45 | 56 | 13    |
| <i>Halococcaceae</i>    | <i>Halococcus hamelinensis</i>       | 100A6         | GCA_000336675.1 | 3.41907 | 37 | ND | 32    |
| <i>Halococcaceae</i>    | <i>Halococcus saccharolyticus</i>    | DSM 5350      | GCA_000336915.1 | 3.44970 | 37 | 42 | 33    |
| <i>Halococcaceae</i>    | <i>Halococcus salifodinae</i>        | DSM 8989      | GCA_000336935.1 | 4.19978 | 40 | 50 | 34    |
| <i>Halococcaceae</i>    | <i>Halococcus sediminicola</i>       | CBA1101       | GCA_000755245.1 | 3.76437 | 40 | 40 | 35    |
| <i>Halococcaceae</i>    | <i>Halococcus thailandensis</i>      | JCM 13552     | GCA_000336715.1 | 4.05243 | 37 | 45 | 36    |
| <i>Haloferacaceae</i>   | <i>Halobellus clavatus</i>           | CGMCC 1.10118 | GCA_900107195   | 3.75498 | 37 | 50 | 37    |
| <i>Haloferacaceae</i>   | <i>Halobellus rufus</i>              | CBA1103       | GCA_000739575.1 | 3.85222 | 37 | 55 | 38    |
| <i>Haloferacaceae</i>   | <i>Haloferax alexandrinus</i>        | JCM 10717     | GCA_000336735.1 | 3.64926 | ND | 55 | 39    |
| <i>Haloferacaceae</i>   | <i>Haloferax denitrificans</i>       | ATCC 35960    | GCA_000337795.1 | 3.82597 | ND | 55 | 40    |
| <i>Haloferacaceae</i>   | <i>Haloferax elongans</i>            | ATCC BAA-1513 | GCA_000336755.1 | 3.95214 | 53 | 55 | 41    |
| <i>Haloferacaceae</i>   | <i>Haloferax gibbonsii</i>           | ATCC 33959    | GCA_000336775.1 | 4.05732 | 40 | 55 | 42    |
| <i>Haloferacaceae</i>   | <i>Haloferax larsenii</i>            | JCM 13917     | GCA_000336955.1 | 3.69795 | 45 | 55 | 43    |
| <i>Haloferacaceae</i>   | <i>Haloferax lucentense</i>          | DSM 14919     | GCA_000336795.1 | 3.61906 | 37 | 45 | 44    |
| <i>Haloferacaceae</i>   | <i>Haloferax mediterranei</i>        | ATCC 33500    | GCA_000685635.1 | 3.90670 | 51 | 55 | 45    |
| <i>Haloferacaceae</i>   | <i>Haloferax mucosum</i>             | ATCC BAA-1512 | GCA_000337815.1 | 3.36898 | 53 | 55 | 41    |
| <i>Haloferacaceae</i>   | <i>Haloferax prahovense</i>          | DSM 18310     | GCA_000336815.1 | 3.99880 | 48 | 51 | 46    |
| <i>Haloferacaceae</i>   | <i>Haloferax volcanii</i>            | DS2           | GCA_000025685.1 | 4.01290 | 45 | 49 | 13    |
| <i>Haloferacaceae</i>   | <i>Halogeometricum borinquense</i>   | PR 3          | GCA_000172995.2 | 3.94447 | 40 | 50 | 47    |
| <i>Haloferacaceae</i>   | <i>Halogeometricum limi</i>          | CGMCC 1.8711  | GCA_900115785.1 | 3.61627 | 37 | 50 | 48,49 |
| <i>Haloferacaceae</i>   | <i>Halogeometricum pallidum</i>      | JCM 14848     | GCA_000337095.1 | 4.38452 | 30 | 45 | 48,50 |
| <i>Haloferacaceae</i>   | <i>Halogeometricum rufum</i>         | CGMCC 1.7736  | GCA_900112175.1 | 4.18712 | 42 | 55 | 51    |
| <i>Haloferacaceae</i>   | <i>Halopelagius inordinatus</i>      | CGMCC 1.7739  | GCA_900113245.1 | 3.52931 | 37 | 50 | 52    |

---

|                       |                                   |               |                 |         |    |    |    |
|-----------------------|-----------------------------------|---------------|-----------------|---------|----|----|----|
| <i>Haloferacaceae</i> | <i>Haloplanus natans</i>          | DSM 17983     | GCA_000427685.1 | 3.79793 | 40 | 52 | 53 |
| <i>Haloferacaceae</i> | <i>Haloplanus vesicus</i>         | CGMCC 1.8712  | GCA_900107665.1 | 2.77686 | 40 | 50 | 52 |
| <i>Haloferacaceae</i> | <i>Haloprofundus marisrubri</i>   | SB9           | GCA_001469955.1 | 3.92956 | 35 | 45 | 54 |
| <i>Haloferacaceae</i> | <i>Haloquadratum walsbyi</i>      | DSM 16854     | GCA_000237865.1 | 3.26048 | 45 | 55 | 55 |
| <i>Halorubraceae</i>  | <i>Halobaculum gomorrense</i>     | DSM 9297      | GCA_900129775.1 | 3.20825 | 40 | 45 | 56 |
| <i>Halorubraceae</i>  | <i>Halogramum amylolyticum</i>    | CGMCC 1.10121 | GCA_900110465.1 | 5.18569 | 37 | 50 | 57 |
| <i>Halorubraceae</i>  | <i>Halogramum gelatinilyticum</i> | CGMCC 1.10119 | GCA_900103715.1 | 3.77019 | 37 | 50 | 57 |
| <i>Halorubraceae</i>  | <i>Halogramum rubrum</i>          | CGMCC 1.7738  | GCA_900114455.1 | 4.56668 | 37 | 50 | 58 |
| <i>Halorubraceae</i>  | <i>Halogramum salarium</i>        | B-1           | GCA_000283335.1 | 4.49231 | 37 | 50 | 59 |
| <i>Halorubraceae</i>  | <i>Halohasta litchfieldiae</i>    | DSM 22187     | GCA_900109065.1 | 3.28459 | 30 | 45 | 60 |
| <i>Halorubraceae</i>  | <i>Halolamina pelagica</i>        | CGMCC 1.10329 | GCA_900115675.1 | 3.16063 | 37 | 50 | 61 |
| <i>Halorubraceae</i>  | <i>Halolamina rubra</i>           | CBA1107       | GCA_000739555.1 | 2.95500 | 37 | 50 | 62 |
| <i>Halorubraceae</i>  | <i>Halolamina sediminis</i>       | Halo7         | GCA_001282785.1 | 2.83586 | 40 | 45 | 63 |
| <i>Halorubraceae</i>  | <i>Halopenitus malekzadehii</i>   | IBRC-M 10418  | GCA_900108505.1 | 3.13682 | 40 | 50 | 64 |
| <i>Halorubraceae</i>  | <i>Halopenitus persicus</i>       | KCTC 4046     | GCA_900107205.1 | 3.42449 | 40 | 50 | 65 |
| <i>Halorubraceae</i>  | <i>Halorubrum aidingense</i>      | JCM 13560     | GCA_000336995.1 | 3.10853 | 42 | 52 | 66 |
| <i>Halorubraceae</i>  | <i>Halorubrum arcis</i>           | JCM 13916     | GCA_000337015.1 | 3.38260 | 42 | 55 | 67 |
| <i>Halorubraceae</i>  | <i>Halorubrum californiense</i>   | DSM 19288     | GCA_000336875.1 | 3.68287 | 37 | 42 | 68 |
| <i>Halorubraceae</i>  | <i>Halorubrum coriense</i>        | DSM 10284     | GCA_000337035.1 | 3.64531 | 50 | 56 | 69 |
| <i>Halorubraceae</i>  | <i>Halorubrum distributum</i>     | JCM 10118     | GCA_000337335.1 | 3.30613 | 45 | 50 | 69 |
| <i>Halorubraceae</i>  | <i>Halorubrum ezzemoulense</i>    | DSM 17463     | GCA_000421805.1 | 3.59148 | 40 | 50 | 70 |
| <i>Halorubraceae</i>  | <i>Halorubrum halophilum</i>      | B8            | GCA_000739595.1 | 3.67798 | 40 | 45 | 71 |
| <i>Halorubraceae</i>  | <i>Halorubrum kocurii</i>         | JCM 14978     | GCA_000337355.1 | 3.61974 | 37 | 55 | 72 |
| <i>Halorubraceae</i>  | <i>Halorubrum lacusprofundi</i>   | ATCC 49239    | GCA_000022205.1 | 3.69258 | 37 | 45 | 73 |
| <i>Halorubraceae</i>  | <i>Halorubrum lipolyticum</i>     | DSM 21995     | GCA_000337375.1 | 3.42504 | 48 | 58 | 66 |
| <i>Halorubraceae</i>  | <i>Halorubrum litoreum</i>        | JCM 13561     | GCA_000337395.1 | 3.13776 | 42 | 55 | 74 |
| <i>Halorubraceae</i>  | <i>Halorubrum saccharovororum</i> | DSM 1137      | GCA_000337915.1 | 3.42370 | 50 | 56 | 75 |

---

|                      |                                     |               |                 |         |    |    |        |
|----------------------|-------------------------------------|---------------|-----------------|---------|----|----|--------|
| <i>Halorubraceae</i> | <i>Halorubrum sodomense</i>         | RD 26         | GCA_900111935.1 | 3.03055 | 40 | 50 | 75     |
| <i>Halorubraceae</i> | <i>Halorubrum tebenquichense</i>    | DSM 14210     | GCA_000337415.1 | 3.32886 | ND | 50 | 76     |
| <i>Halorubraceae</i> | <i>Halorubrum terrestre</i>         | JCM 10247     | GCA_000337435.1 | 3.37622 | 45 | 50 | 77     |
| <i>Natrialbaceae</i> | <i>Halobiforma haloterrestris</i>   | DSM 13078     | GCA_900112205.1 | 4.49544 | 42 | 58 | 78     |
| <i>Natrialbaceae</i> | <i>Halobiforma lacisalsi</i>        | AJ5           | GCA_000226975.3 | 4.38154 | 45 | 57 | 79     |
| <i>Natrialbaceae</i> | <i>Halobiforma nitratireducens</i>  | JCM 10879     | GCA_000337895.1 | 3.68875 | 41 | 44 | 78,80  |
| <i>Natrialbaceae</i> | <i>Halopiger salifodinae</i>        | CGMCC 1.12284 | GCA_900110455.1 | 4.27217 | 45 | 50 | 81     |
| <i>Natrialbaceae</i> | <i>Halopiger xanaduensis</i>        | SH-6          | GCA_000217715.1 | 4.35527 | 37 | 45 | 82     |
| <i>Natrialbaceae</i> | <i>Halostagnicola kamekurae</i>     | DSM 22427     | GCA_900116205.1 | 4.10815 | 30 | 45 | 83     |
| <i>Natrialbaceae</i> | <i>Halostagnicola larsenii</i>      | XH-48         | GCA_000517625.1 | 4.13118 | 37 | 50 | 84     |
| <i>Natrialbaceae</i> | <i>Haloterrigena daqingensis</i>    | JX313         | GCA_001971705.1 | 3.83580 | 35 | 50 | 85     |
| <i>Natrialbaceae</i> | <i>Haloterrigena jeotgali</i>       | A29           | GCA_000710605.1 | 4.13162 | 45 | 50 | 86     |
| <i>Natrialbaceae</i> | <i>Haloterrigena limicola</i>       | JCM 13563     | GCA_000337475.1 | 3.52203 | 50 | 61 | 87     |
| <i>Natrialbaceae</i> | <i>Haloterrigena saccharevitans</i> | AB14          | GCA_001953745.1 | 3.98062 | 45 | 58 | 88     |
| <i>Natrialbaceae</i> | <i>Haloterrigena salina</i>         | JCM 13891     | GCA_000337495.1 | 4.84161 | 37 | 50 | 89     |
| <i>Natrialbaceae</i> | <i>Haloterrigena thermotolerans</i> | DSM 11522     | GCA_000337115.1 | 3.89527 | 50 | 60 | 90     |
| <i>Natrialbaceae</i> | <i>Haloterrigena turkmenica</i>     | DSM 5511      | GCA_000025325.1 | 5.44078 | 45 | 57 | 91, 13 |
| <i>Natrialbaceae</i> | <i>Halovivax asiaticus</i>          | JCM 14624     | GCA_000337515.1 | 3.23845 | 37 | 50 | 84     |
| <i>Natrialbaceae</i> | <i>Halovivax ruber</i>              | XH-70         | GCA_000328525.1 | 3.22388 | 37 | 45 | 92     |
| <i>Natrialbaceae</i> | <i>Natrialba aegyptia</i>           | DSM 13077     | GCA_000337535.1 | 4.61836 | 42 | 60 | 93     |
| <i>Natrialbaceae</i> | <i>Natrialba asiatica</i>           | DSM 12278     | GCA_000337555.1 | 4.40418 | 40 | 50 | 93     |
| <i>Natrialbaceae</i> | <i>Natrialba chahannaensis</i>      | JCM 10990     | GCA_000337135.1 | 4.30927 | 45 | 55 | 94     |
| <i>Natrialbaceae</i> | <i>Natrialba hulunbeirensis</i>     | JCM 10989     | GCA_000337575.1 | 4.15961 | 50 | 55 | 94     |
| <i>Natrialbaceae</i> | <i>Natrialba magadii</i>            | ATCC 43099    | GCA_000025625.1 | 4.44364 | 40 | 50 | 95     |
| <i>Natrialbaceae</i> | <i>Natrialba taiwanensis</i>        | DSM 12281     | GCA_000337595.1 | 4.63519 | 40 | 55 | 93     |
| <i>Natrialbaceae</i> | <i>Natrinema altunense</i>          | AJ2           | GCA_000731985.1 | 3.77413 | ND | ND |        |
| <i>Natrialbaceae</i> | <i>Natrinema ejinorensis</i>        | JCM 13890     | NXNI00000000    | 4.47632 | 37 | 50 | 6      |

|                      |                                         |              |                 |         |    |      |                 |
|----------------------|-----------------------------------------|--------------|-----------------|---------|----|------|-----------------|
| <i>Natrialbaceae</i> | <i>Natrinema gari</i>                   | JCM 14663    | GCA_000337175.1 | 4.02369 | 40 | 60   | 96              |
| <i>Natrialbaceae</i> | <i>Natrinema pallidum</i>               | DSM 3751     | GCA_000337615.1 | 3.91581 | 40 | ND   | 97              |
| <i>Natrialbaceae</i> | <i>Natrinema pellirubrum</i>            | DSM 15624    | GCA_000230735.3 | 4.35410 | 40 | 45   | 97              |
| <i>Natrialbaceae</i> | <i>Natrinema salaciae</i>               | DSM 25055    | GCA_900110865.1 | 4.85702 | 45 | 52.5 | 2               |
| <i>Natrialbaceae</i> | <i>Natrinema thermophila</i>            | CBA1119      | PDBS00000000    | 5.05806 | 55 | 66   | From this study |
| <i>Natrialbaceae</i> | <i>Natrinema versiforme</i>             | JCM 10478    | GCA_000337195.1 | 4.19080 | 46 | 53   | 98              |
| <i>Natrialbaceae</i> | <i>Natronobacterium gregoryi</i>        | SP2          | GCA_000230715.3 | 3.78836 | 37 | 40   | 95              |
| <i>Natrialbaceae</i> | <i>Natronobacterium texcoconense</i>    | DSM 24767    | GCA_900104065.1 | 4.00987 | 37 | 45   | 99              |
| <i>Natrialbaceae</i> | <i>Natronococcus amylolyticus</i>       | DSM 10524    | GCA_000337675.1 | 4.41653 | 45 | 50   | 100             |
| <i>Natrialbaceae</i> | <i>Natronococcus jeotgali</i>           | DSM 18795    | GCA_000337695.1 | 4.49618 | 45 | 50   | 101             |
| <i>Natrialbaceae</i> | <i>Natronococcus occultus</i>           | SP4          | GCA_000328685.1 | 4.31412 | 45 | 54   | 13              |
| <i>Natrialbaceae</i> | <i>Natronolimnobius baerhuensis</i>     | JCM 12253    | GCA_001316185.1 | 3.89306 | 37 | 46   | 102             |
| <i>Natrialbaceae</i> | <i>Natronolimnobius innermongolicus</i> | JCM 12255    | GCA_000337215.1 | 4.58863 | 45 | 54   | 102             |
| <i>Natrialbaceae</i> | <i>Natronorubrum bangense</i>           | JCM 10635    | GCA_000337715.1 | 4.11128 | 45 | 55   | 103             |
| <i>Natrialbaceae</i> | <i>Natronorubrum sediminis</i>          | CGMCC 1.8981 | GCA_900108095.1 | 3.78254 | 37 | 50   | 104             |
| <i>Natrialbaceae</i> | <i>Natronorubrum sulfidifaciens</i>     | JCM 14089    | GCA_000337735.1 | 3.46029 | 47 | 55   | 105             |
| <i>Natrialbaceae</i> | <i>Natronorubrum texcoconense</i>       | DSM 25211    | GCA_900100335.1 | 4.64179 | 37 | 45   | 106             |
| <i>Natrialbaceae</i> | <i>Natronorubrum tibetense</i>          | GA33         | GCA_000383975.1 | 4.93484 | 45 | ND   | 103             |

95 \*ND, No data

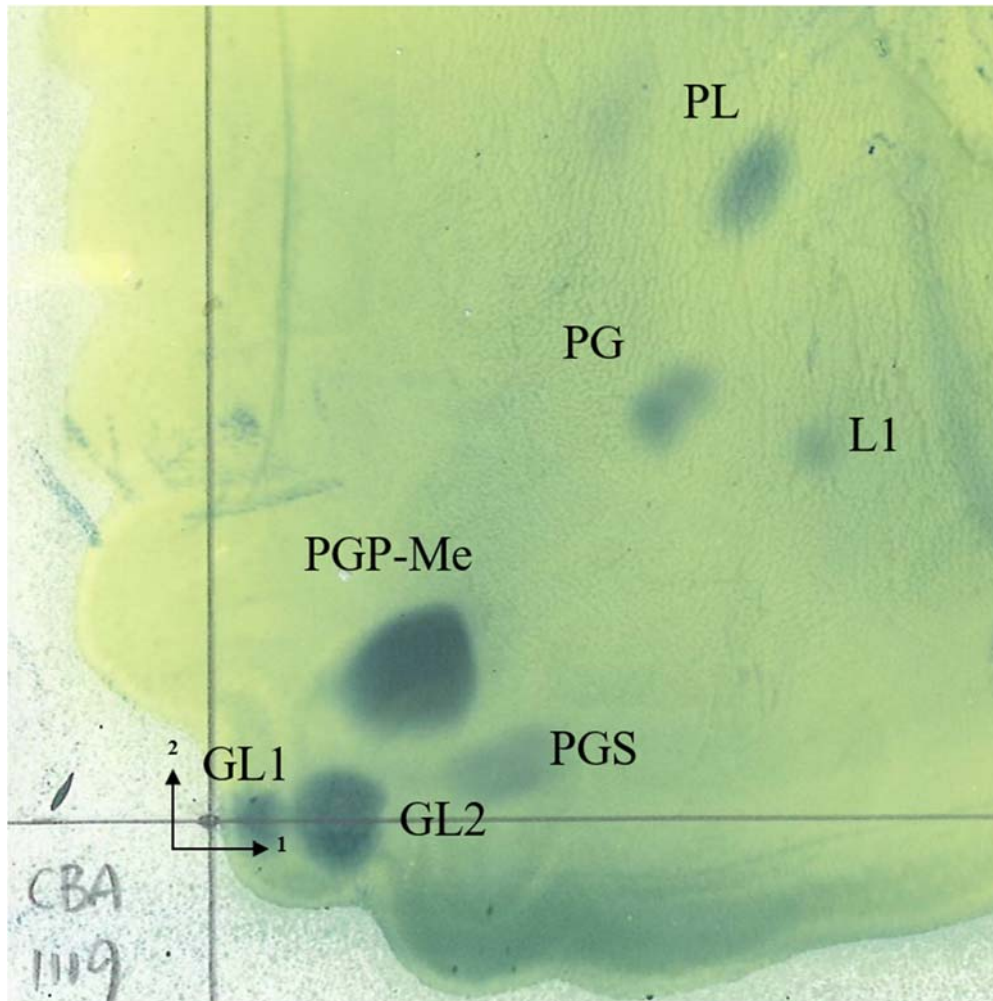

96

97 **Supplementary Figure S1.** High performance thin-layer chromatogram of total lipids from  
98 strain CBA1119<sup>T</sup>. Total lipids were detected using 5% ethanolic molybdophosphoric acid.

99 Abbreviations: PG, phosphatidylglycerol; PGP-Me, phosphatidylglycerol phosphate methyl

100 ester; PGS, phosphatidylglycerol sulfate; GL1–2, unidentified glycolipids; PL, unidentified

101 phospholipid; L1, unidentified lipid.

102

103

**A**

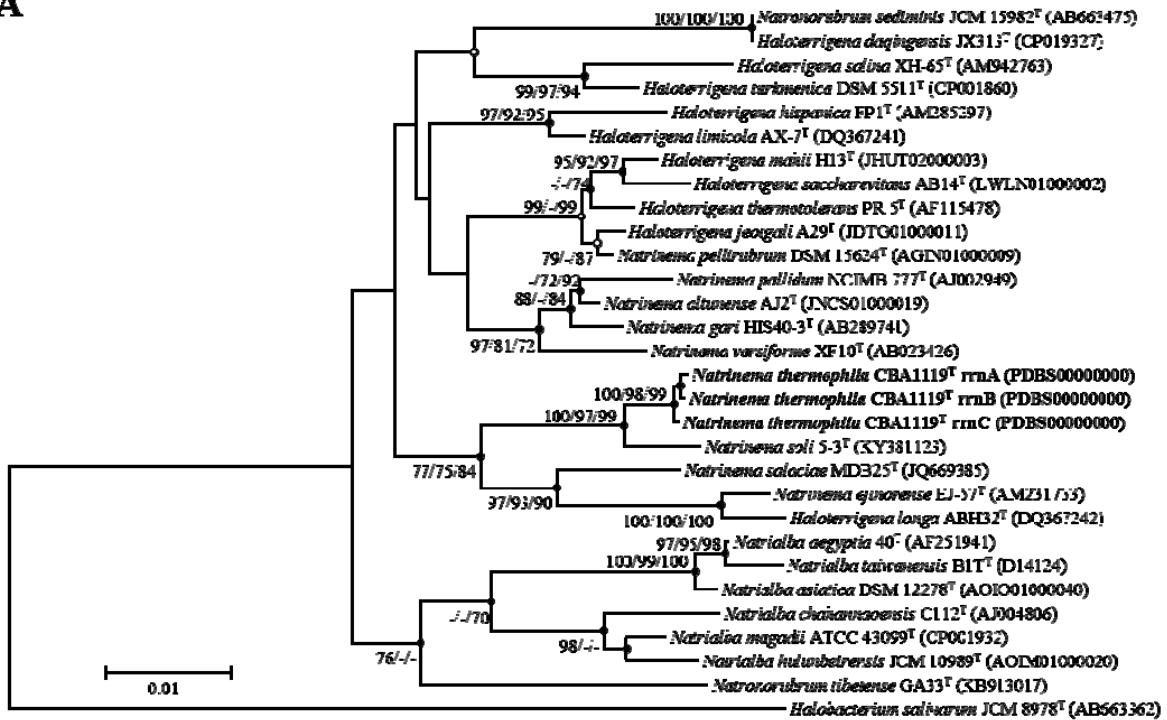

**B**

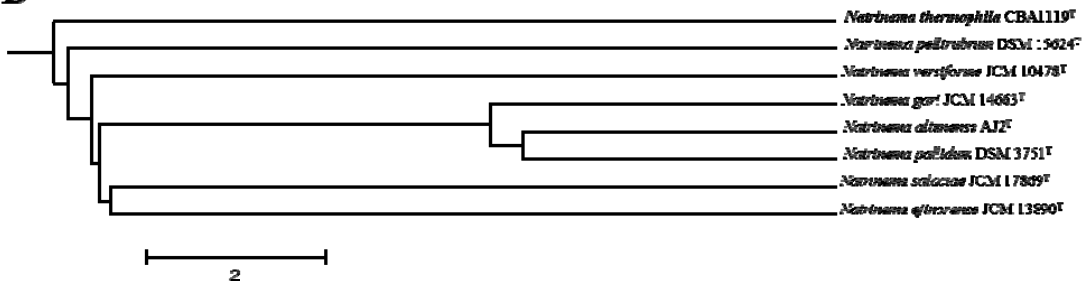

104

105 **Supplementary Figure S2.** Phylogenetic trees. (A) Tree based on 16S rRNA gene sequences

106 of strain CBA1119<sup>T</sup> and related species. The tree was constructed based on the neighbor-joining

107 (NJ) algorithm. Bootstrap values (> 70%) at the nodes were calculated using probabilities of

108 the NJ, maximum likelihood (ML), and maximum parsimony (MP) algorithms. Closed circles

109 indicate nodes determined with both ML and MP algorithms, and open circles indicate nodes

110 determined with ML or MP algorithm. *Halobacterium salinarum* JCM 8978<sup>T</sup> was used as the

111 outgroup species. (B) Tree based on OrthoANI values of strain CBA1119<sup>T</sup> and other *Natrinema*

112 spp.

113 **REFERENCES**

- 114 1. Wayne, L. G. *et al.* Report of the Ad Hoc Committee on Reconciliation of Approaches  
115 to Bacterial Systematics. *Int J Syst Evol Microbiol* **37**, 463-464 (1987).
- 116 2. Albuquerque, L., Taborda, M., La Cono, V., Yakimov, M. & da Costa, M. S. *Natrinema*  
117 *salaciae* sp. nov., a halophilic archaeon isolated from the deep, hypersaline anoxic Lake  
118 Medee in the Eastern Mediterranean Sea. *Syst Appl Microbiol* **35**, 368-373 (2012).
- 119 3. Minegishi, H., Kamekura, M., Itoh, T., Echigo, A., Usami, R. & Hashimoto, T. Further  
120 refinement of the phylogeny of the Halobacteriaceae based on the full-length RNA  
121 polymerase subunit B' (*rpoB'*) gene. *Int J Syst Evol Microbiol* **60**, 2398-2408 (2010).
- 122 4. Rasooli, M. *et al.* *Natrinema soli* sp. nov., a novel halophilic archaeon isolated from a  
123 hypersaline wetland. *Int J Syst Evol Microbiol* **67**, 2142-2147 (2017).
- 124 5. Tindall, B. J. Taxonomic problems arising in the genera *Haloterrigena* and *Natrinema*.  
125 *Int J Syst Evol Microbiol* **53**, 1697-1698 (2003).
- 126 6. Castillo, A. M. *et al.* *Natrinema ejinorensis* sp. nov., isolated from a saline lake in Inner  
127 Mongolia, China. *Int J Syst Evol Microbiol* **56**, 2683-2687 (2006).
- 128 7. Song, H. S. *et al.* *Halapricum salinum* gen. nov., sp. nov., an extremely halophilic  
129 archaeon isolated from non-purified solar salt. *Antonie Van Leeuwenhoek* **105**, 979-986  
130 (2014).
- 131 8. Yang, Y., Cui, H. L., Zhou, P. J. & Liu, S. J. *Haloarcula amylolytica* sp. nov., an  
132 extremely halophilic archaeon isolated from Aibi salt lake in Xin-Jiang, China. *Int J*  
133 *Syst Evol Microbiol* **57**, 103-106 (2007).
- 134 9. Ihara, K., Watanabe, S. & Tamura, T. *Haloarcula argentinensis* sp. nov. and *Haloarcula*  
135 *mukohataei* sp. nov., two new extremely halophilic archaea collected in Argentina. *Int*  
136 *J Syst Bacteriol* **47**, 73-77 (1997).
- 137 10. Ventosa, A. *Haloarcula*. In: *Bergey's Manual of Systematics of Archaea and Bacteria*.

- 138 John Wiley & Sons, Ltd (2015).
- 139 11. Takashina, T., Hamamoto, T., Otozai, K., Grant, W. D. & Horikoshi, K. *Haloarcula*  
140 *japonica* sp. nov., a new triangular halophilic archaeobacterium. *Syst Appl Microbiol* **13**,  
141 177-181 (1990).
- 142 12. Oren, A., Ginzburg, M., Ginzburg, B. Z., Hochstein, L. I. & Volcani, B. E. *Haloarcula*  
143 *marismortui* (Volcani) sp. nov., nom. rev., an extremely halophilic bacterium from the  
144 Dead Sea. *Int J Syst Bacteriol* **40**, 209-210 (1990).
- 145 13. Robinson, J. L. *et al.* Growth Kinetics of Extremely Halophilic Archaea (Family  
146 Halobacteriaceae) as Revealed by Arrhenius Plots. *J Bacteriol* **187**, 923-929 (2005).
- 147 14. Kharroub, K. *et al.* *Halomicrobium katesii* sp. nov., an extremely halophilic archaeon.  
148 *Int J Syst Evol Microbiol* **58**, 2354-2358 (2008).
- 149 15. Oren, A., Elevi, R., Watanabe, S., Ihara, K. & Corcelli, A. *Halomicrobium mukohataei*  
150 gen. nov., comb. nov., and emended description of *Halomicrobium mukohataei*. *Int J*  
151 *Syst Evol Microbiol* **52**, 1831-1835 (2002).
- 152 16. Yang, X. & Cui, H. L. *Halomicrobium zhouii* sp. nov., a halophilic archaeon from a  
153 marine solar saltern. *Int J Syst Evol Microbiol* **62**, 1235-1240 (2012).
- 154 17. Antunes, A., Taborda, M., Huber, R., Moissl, C., Nobre, M. F. & da Costa, M. S.  
155 *Halorhabdus tiamatea* sp. nov., a non-pigmented, extremely halophilic archaeon from  
156 a deep-sea, hypersaline anoxic basin of the Red Sea, and emended description of the  
157 genus *Halorhabdus*. *Int J Syst Evol Microbiol* **58**, 215-220 (2008).
- 158 18. Waino, M., Tindall, B. J. & Ingvorsen, K. *Halorhabdus utahensis* gen. nov., sp. nov.,  
159 an aerobic, extremely halophilic member of the Archaea from Great Salt Lake, Utah.  
160 *Int J Syst Evol Microbiol*, 183-190 (2000).
- 161 19. Amoozegar, M. A., Makhdoumi-Kakhki, A., Mehrshad, M., Fazeli, S. A., Sproer, C. &  
162 Ventosa, A. *Halorientalis persicus* sp. nov., an extremely halophilic archaeon isolated



- 163 from a salt lake and emended description of the genus *Halorientalis*. *Int J Syst Evol*  
164 *Microbiol* **64**, 940-944 (2014).
- 165 20. Vreeland, R. H., Straight, S., Krammes, J., Dougherty, K., Rosenzweig, W. D. &  
166 Kamekura, M. *Halosimplex carlsbadense* gen. nov., sp. nov., a unique halophilic  
167 archaeon, with three 16S rRNA genes, that grows only in defined medium with glycerol  
168 and acetate or pyruvate. *Extremophiles* **6**, 445-452 (2002).
- 169 21. Roh, S. W., Lee, M. L. & Bae, J. W. *Haladaptatus cibarius* sp. nov., an extremely  
170 halophilic archaeon from seafood, and emended description of the genus *Haladaptatus*.  
171 *Int J Syst Evol Microbiol* **60**, 1187-1190 (2010).
- 172 22. Cui, H. L. *et al.* *Haladaptatus litoreus* sp. nov., an extremely halophilic archaeon from  
173 a marine solar saltern, and emended description of the genus *Haladaptatus*. *Int J Syst*  
174 *Evol Microbiol* **60**, 1085-1089 (2010).
- 175 23. Savage, K. N., Krumholz, L. R., Oren, A. & Elshahed, M. S. *Haladaptatus*  
176 *paucihalophilus* gen. nov., sp. nov., a halophilic archaeon isolated from a low-salt,  
177 sulfide-rich spring. *Int J Syst Evol Microbiol* **57**, 19-24 (2007).
- 178 24. Roh, S. W. *et al.* *Halalkalicoccus jeotgali* sp. nov., a halophilic archaeon from shrimp  
179 jeotgal, a traditional Korean fermented seafood. *Int J Syst Evol Microbiol* **57**, 2296-  
180 2298 (2007).
- 181 25. Liu, B. B. *et al.* *Halalkalicoccus paucihalophilus* sp. nov., a halophilic archaeon from  
182 Lop Nur region in Xinjiang, northwest of China. *Antonie Van Leeuwenhoek* **103**, 1007-  
183 1014 (2013).
- 184 26. Minegishi, H., Echigo, A., Nagaoka, S., Kamekura, M. & Usami, R. *Halarchaeum*  
185 *acidiphilum* gen. nov., sp. nov., a moderately acidophilic haloarchaeon isolated from  
186 commercial solar salt. *Int J Syst Evol Microbiol* **60**, 2513-2516 (2010).
- 187 27. Makhdoumi-Kakhki, A., Amoozegar, M. A., Bagheri, M., Ramezani, M. & Ventosa, A.

- 188           *Haloarchaeobius iranensis* gen. nov., sp. nov., an extremely halophilic archaeon  
189 isolated from a saline lake. *Int J Syst Evol Microbiol* **62**, 1021-1026 (2012).
- 190 28.   Yang, Y., Cui, H. L., Zhou, P. J. & Liu, S. J. *Halobacterium jilantaiense* sp. nov., a  
191 halophilic archaeon isolated from a saline lake in Inner Mongolia, China. *Int J Syst Evol*  
192 *Microbiol* **56**, 2353-2355 (2006).
- 193 29.   Sorokin, D. Y. *et al.* Discovery of anaerobic lithoheterotrophic haloarchaea, ubiquitous  
194 in hypersaline habitats. *ISME J* **11**, 1245-1260 (2017).
- 195 30.   Makhdoumi-Kakhki, A., Amoozegar, M. A. & Ventosa, A. *Halovenus aranensis* gen.  
196 nov., sp. nov., an extremely halophilic archaeon from Aran-Bidgol salt lake. *Int J Syst*  
197 *Evol Microbiol* **62**, 1331-1336 (2012).
- 198 31.   Burns, D. G. *et al.* *Natronomonas moolapensis* sp. nov., non-alkaliphilic isolates  
199 recovered from a solar saltern crystallizer pond, and emended description of the genus  
200 *Natronomonas*. *Int J Syst Evol Microbiol* **60**, 1173-1176 (2010).
- 201 32.   Goh, F. *et al.* *Halococcus hamelinensis* sp. nov., a novel halophilic archaeon isolated  
202 from stromatolites in Shark Bay, Australia. *Int J Syst Evol Microbiol* **56**, 1323-1329  
203 (2006).
- 204 33.   Montero, C. G., Ventosa, A., Rodriguez-Valera, F., Kates, M., Moldoveanu, N. & Ruiz-  
205 Berraquero, F. *Halococcus saccharolyticus* sp. nov., a new species of extremely  
206 halophilic non-alkaliphilic cocci. *Syst Appl Microbiol* **12**, 167-171 (1989).
- 207 34.   Denner, E. B., McGENITY, T. J., BUSSE, H.-J., Grant, W. D., Wanner, G. & Stan-  
208 Lotter, H. *Halococcus salifodinae* sp. nov., an archaeal isolate from an Austrian salt  
209 mine. *Int J Syst Evol Microbiol* **44**, 774-780 (1994).
- 210 35.   Yim, K. J. *et al.* *Halococcus sediminicola* sp. nov., an extremely halophilic archaeon  
211 isolated from a marine sediment. *Antonie Van Leeuwenhoek* **105**, 73-79 (2014).
- 212 36.   Namwong, S., Tanasupawat, S., Visessanguan, W., Kudo, T. & Itoh, T. *Halococcus*

- 213            *thailandensis* sp. nov., from fish sauce in Thailand. *Int J Syst Evol Microbiol* **57**, 2199-  
214            2203 (2007).
- 215    37.    Cui, H. L., Yang, X., Gao, X. & Xu, X. W. *Halobellus clavatus* gen. nov., sp. nov. and  
216            *Halorientalis regularis* gen. nov., sp. nov., two new members of the family  
217            *Halobacteriaceae*. *Int J Syst Evol Microbiol* **61**, 2682-2689 (2011).
- 218    38.    Cha, I. T. *et al.* *Halobellus rufus* sp. nov., an extremely halophilic archaeon isolated  
219            from non-purified solar salt. *Antonie Van Leeuwenhoek* **105**, 925-932 (2014).
- 220    39.    Asker, D. & Ohta, Y. *Haloferax alexandrinus* sp. nov., an extremely halophilic  
221            canthaxanthin-producing archaeon from a solar saltern in Alexandria (Egypt). *Int J Syst*  
222            *Evol Microbiol* **52**, 729-738 (2002).
- 223    40.    Tindall, B. J., Tomlinson, G. A. & Hochstein, L. I. Transfer of *Halobacterium*  
224            *denitrificans* (Tomlinson, Jahnke, and Hochstein) to the genus *Haloferax* as *Haloferax*  
225            *denitrificans* comb. nov. *Int J Syst Bacteriol* **39**, 359-360 (1989).
- 226    41.    Allen, M. A. *et al.* *Haloferax elongans* sp. nov. and *Haloferax mucosum* sp. nov.,  
227            isolated from microbial mats from Hamelin Pool, Shark Bay, Australia. *Int J Syst Evol*  
228            *Microbiol* **58**, 798-802 (2008).
- 229    42.    Juez, G., Rodriguez-Valera, F., Ventosa, A. & Kushner, D. J. *Haloarcula hispanica* spec.  
230            nov. and *Haloferax gibbonsii* spec. nov., two new species of extremely halophilic  
231            archaeobacteria. *Syst Appl Microbiol* **8**, 75-79 (1986).
- 232    43.    Xu, X. W., Wu, Y. H., Wang, C. S., Oren, A., Zhou, P. J. & Wu, M. *Haloferax larsenii*  
233            sp. nov., an extremely halophilic archaeon from a solar saltern. *Int J Syst Evol Microbiol*  
234            **57**, 717-720 (2007).
- 235    44.    Gutierrez, M. C., Kamekura, M., Holmes, M. L., Dyall-Smith, M. L. & Ventosa, A.  
236            Taxonomic characterization of *Haloferax* sp. ("*H. alicantei*") strain Aa 2.2: description  
237            of *Haloferax lucentensis* sp. nov. *Extremophiles* **6**, 479-483 (2002).

- 238 45. Ventosa, A. *Haloferax*. In: *Bergey's Manual of Systematics of Archaea and Bacteria*.  
239 John Wiley & Sons, Ltd (2015).
- 240 46. Enache, M., Itoh, T., Kamekura, M., Teodosiu, G. & Dumitru, L. *Haloferax prahovense*  
241 sp. nov., an extremely halophilic archaeon isolated from a Romanian salt lake. *Int J Syst*  
242 *Evol Microbiol* **57**, 393-397 (2007).
- 243 47. Montalvo-Rodriguez, R., Vreeland, R. H., Oren, A., Kessel, M., Betancourt, C. &  
244 Lopez-Garriga, J. *Halogeometricum borinquense* gen. nov., sp. nov., a novel halophilic  
245 archaeon from Puerto Rico. *Int J Syst Bacteriol*, 1305-1312 (1998).
- 246 48. Qiu, X. X., Zhao, M. L., Han, D., Zhang, W. J., Dyll-Smith, M. L. & Cui, H. L.  
247 Taxonomic study of the genera *Halogeometricum* and *Halosarcina*: transfer of  
248 *Halosarcina limi* and *Halosarcina pallida* to the genus *Halogeometricum* as  
249 *Halogeometricum limi* comb. nov. and *Halogeometricum pallidum* comb. nov.,  
250 respectively. *Int J Syst Evol Microbiol* **63**, 3915-3919 (2013).
- 251 49. Cui, H. L. *et al.* *Halosarcina limi* sp. nov., a halophilic archaeon from a marine solar  
252 saltern, and emended description of the genus *Halosarcina*. *Int J Syst Evol Microbiol*  
253 **60**, 2462-3466 (2010).
- 254 50. Savage, K. N., Krumholz, L. R., Oren, A. & Elshahed, M. S. *Halosarcina pallida* gen.  
255 nov., sp. nov., a halophilic archaeon from a low-salt, sulfide-rich spring. *Int J Syst Evol*  
256 *Microbiol* **58**, 856-860 (2008).
- 257 51. Cui, H. L. *et al.* *Halogeometricum rufum* sp. nov., a halophilic archaeon from a marine  
258 solar saltern, and emended description of the genus *Halogeometricum*. *Int J Syst Evol*  
259 *Microbiol* **60**, 2613-2617 (2010).
- 260 52. Cui, H. L. *et al.* *Halopelagius inordinatus* gen. nov., sp. nov., a new member of the  
261 family *Halobacteriaceae* isolated from a marine solar saltern. *Int J Syst Evol Microbiol*  
262 **60**, 2089-2093 (2010).

- 263 53. Bardavid, R. E., Mana, L. & Oren, A. *Haloplanus natans* gen. nov., sp. nov., an  
264 extremely halophilic, gas-vacuolate archaeon isolated from Dead Sea-Red Sea water  
265 mixtures in experimental outdoor ponds. *Int J Syst Evol Microbiol* **57**, 780-783 (2007).
- 266 54. Zhang, G. *et al.* *Haloprofundus marisrubri* gen. nov., sp. nov., an extremely halophilic  
267 archaeon isolated from a brine-seawater interface. *Int J Syst Evol Microbiol* **67**, 9-16  
268 (2017).
- 269 55. Burns, D. G. *et al.* *Haloquadratum walsbyi* gen. nov., sp. nov., the square haloarchaeon  
270 of Walsby, isolated from saltern crystallizers in Australia and Spain. *Int J Syst Evol*  
271 *Microbiol* **57**, 387-392 (2007).
- 272 56. Oren, A., Gurevich, P., Gemmell, R. T. & Teske, A. *Halobaculum gomorrense* gen. nov.,  
273 sp. nov., a novel extremely halophilic archaeon from the Dead Sea. *Int J Syst Bacteriol*  
274 **45**, 747-754 (1995).
- 275 57. Cui, H. L., Yang, X., Gao, X. & Xu, X. W. *Halogranum gelatinilyticum* sp. nov. and  
276 *Halogranum amylolyticum* sp. nov., isolated from a marine solar saltern, and emended  
277 description of the genus *Halogranum*. *Int J Syst Evol Microbiol* **61**, 911-915 (2011).
- 278 58. Cui, H. L. *et al.* *Haloplanus vescus* sp. nov., an extremely halophilic archaeon from a  
279 marine solar saltern, and emended description of the genus *Haloplanus*. *Int J Syst Evol*  
280 *Microbiol* **60**, 1824-1827 (2010).
- 281 59. Kim, K. K., Lee, K. C. & Lee, J. S. *Halogranum salarium* sp. nov., a halophilic  
282 archaeon isolated from sea salt. *Syst Appl Microbiol* **34**, 576-580 (2011).
- 283 60. Mou, Y. Z., Qiu, X. X., Zhao, M. L., Cui, H. L., Oh, D. & Dyall-Smith, M. L. *Halohasta*  
284 *litorea* gen. nov. sp. nov., and *Halohasta litchfieldiae* sp. nov., isolated from the Daliang  
285 aquaculture farm, China and from Deep Lake, Antarctica, respectively. *Extremophiles*  
286 **16**, 895-901 (2012).
- 287 61. Cui, H. L., Gao, X., Yang, X. & Xu, X. W. *Halolamina pelagica* gen. nov., sp. nov., a

- 288 new member of the family *Halobacteriaceae*. *Int J Syst Evol Microbiol* **61**, 1617-1621  
289 (2011).
- 290 62. Cha, I. T. *et al.* *Halolamina rubra* sp. nov., a haloarchaeon isolated from non-purified  
291 solar salt. *Antonie Van Leeuwenhoek* **105**, 907-914 (2014).
- 292 63. Koh, H. W., Song, H. S., Song, U., Yim, K. J., Roh, S. W. & Park, S. J. *Halolamina*  
293 *sediminis* sp. nov., an extremely halophilic archaeon isolated from solar salt. *Int J Syst*  
294 *Evol Microbiol* **65**, 2479-2484 (2015).
- 295 64. Amoozegar, M. A., Makhdoumi-Kakhki, A., Mehrshad, M., Fazeli, S. A. & Ventosa, A.  
296 *Halopenitus malekzadehii* sp. nov., an extremely halophilic archaeon isolated from a  
297 salt lake. *Int J Syst Evol Microbiol* **63**, 3232-3236 (2013).
- 298 65. Amoozegar, M. A., Makhdoumi-Kakhki, A., Shahzadeh Fazeli, S. A., Azarbaijani, R.  
299 & Ventosa, A. *Halopenitus persicus* gen. nov., sp. nov., an archaeon from an inland salt  
300 lake. *Int J Syst Evol Microbiol* **62**, 1932-1936 (2012).
- 301 66. Cui, H. L., Tohty, D., Zhou, P. J. & Liu, S. J. *Halorubrum lipolyticum* sp. nov. and  
302 *Halorubrum aidingense* sp. nov., isolated from two salt lakes in Xin-Jiang, China. *Int J*  
303 *Syst Evol Microbiol* **56**, 1631-1634 (2006).
- 304 67. Xu, X. W., Wu, Y. H., Zhang, H. B. & Wu, M. *Halorubrum arcis* sp. nov., an extremely  
305 halophilic archaeon isolated from a saline lake on the Qinghai-Tibet Plateau, China. *Int*  
306 *J Syst Evol Microbiol* **57**, 1069-1072 (2007).
- 307 68. Pesenti, P. T., Sikaroodi, M., Guillevet, P. M., Sanchez-Porro, C., Ventosa, A. &  
308 Litchfield, C. D. *Halorubrum californiense* sp. nov., an extreme archaeal halophile  
309 isolated from a crystallizer pond at a solar salt plant in California. *Int J Syst Evol*  
310 *Microbiol* **58**, 2710-2715 (2008).
- 311 69. McGenity, T. J. & Grant, W. D. *Halorubrum*. In: *Bergey's Manual of Systematics of*  
312 *Archaea and Bacteria*. John Wiley & Sons, Ltd (2015).

- 313 70. Kharroub, K. *et al.* *Halorubrum ezzemoulense* sp. nov., a halophilic archaeon isolated  
314 from Ezzemoul sabkha, Algeria. *Int J Syst Evol Microbiol* **56**, 1583-1588 (2006).
- 315 71. Yim, K. J. *et al.* *Halorubrum halophilum* sp. nov., an extremely halophilic archaeon  
316 isolated from a salt-fermented seafood. *Antonie Van Leeuwenhoek* **105**, 603-612 (2014).
- 317 72. Gutiérrez, M. C. *et al.* *Halorubrum kocurii* sp. nov., an archaeon isolated from a saline  
318 lake. *Int J Syst Evol Microbiol* **58**, 2031-2035 (2008).
- 319 73. Franzmann, P. D. *et al.* *Halobacterium lacusprofundi* sp. nov., a Halophilic Bacterium  
320 Isolated from Deep Lake, Antarctica. *Syst Appl Microbiol* **11**, 20-27 (1988).
- 321 74. Cui, H. L., Lin, Z. Y., Dong, Y., Zhou, P. J. & Liu, S. J. *Halorubrum litoreum* sp. nov.,  
322 an extremely halophilic archaeon from a solar saltern. *Int J Syst Evol Microbiol* **57**,  
323 2204-2206 (2007).
- 324 75. McGenity, T. J. & Grant, W. D. Transfer of *Halobacterium saccharovorum*,  
325 *Halobacterium sodomense*, *Halobacterium trapanicum* NRC 34021 and  
326 *Halobacterium lacusprofundi* to the genus *Halorubrum* gen. nov., as *Halorubrum*  
327 *saccharovorum* comb. nov., *Halorubrum sodomense* comb. nov., *Halorubrum*  
328 *trapanicum* comb. nov., and *Halorubrum lacusprofundi* comb. nov. *Syst Appl Microbiol*  
329 **18**, 237-243 (1995).
- 330 76. Lizama, C. *et al.* *Halorubrum tebenquichense* sp. nov., a novel halophilic archaeon  
331 isolated from the Atacama Saltern, Chile. *Int J Syst Evol Microbiol* **52**, 149-155 (2002).
- 332 77. Fan, H., Xue, Y., Ma, Y., Ventosa, A. & Grant, W. D. *Halorubrum tibetense* sp. nov., a  
333 novel haloalkaliphilic archaeon from Lake Zabuye in Tibet, China. *Int J Syst Evol*  
334 *Microbiol* **54**, 1213-1216 (2004).
- 335 78. Hezayen, F. F., Tindall, B. J., Steinbuchel, A. & Rehm, B. H. Characterization of a novel  
336 halophilic archaeon, *Halobiforma haloterrestris* gen. nov., sp. nov., and transfer of  
337 *Natronobacterium nitratireducens* to *Halobiforma nitratireducens* comb. nov. *Int J Syst*

- 338 *Evol Microbiol* **52**, 2271-2280 (2002).
- 339 79. Xu, X. W., Wu, M., Zhou, P. J. & Liu, S. J. *Halobiforma lacisalsi* sp. nov., isolated from  
340 a salt lake in China. *Int J Syst Evol Microbiol* **55**, 1949-1952 (2005).
- 341 80. Xin, H., Itoh, T., Zhou, P., Suzuki, K. & Nakase, T. *Natronobacterium nitratreducens*  
342 sp. nov., a haloalkaliphilic archaeon isolated from a soda lake in China. *Int J Syst Evol*  
343 *Microbiol* **51**, 1825-1829 (2001).
- 344 81. Zhang, W. Y., Meng, Y., Zhu, X. F. & Wu, M. *Halopiger salifodinae* sp. nov., an  
345 extremely halophilic archaeon isolated from a salt mine. *Int J Syst Evol Microbiol* **63**,  
346 3563-3567 (2013).
- 347 82. Gutiérrez, M. C. *et al.* *Halopiger xanaduensis* gen. nov., sp. nov., an extremely  
348 halophilic archaeon isolated from saline Lake Shangmatale in Inner Mongolia, China.  
349 *Int J Syst Evol Microbiol* **57**, 1402-1407 (2007).
- 350 83. Nagaoka, S., Minegishi, H., Echigo, A. & Usami, R. *Halostagnicola kamekurae* sp.  
351 nov., an extremely halophilic archaeon from solar salt. *Int J Syst Evol Microbiol* **60**,  
352 2828-2831 (2010).
- 353 84. Castillo, A. M. *et al.* *Halostagnicola larsenii* gen. nov., sp. nov., an extremely halophilic  
354 archaeon from a saline lake in Inner Mongolia, China. *Int J Syst Evol Microbiol* **56**,  
355 1519-1524 (2006).
- 356 85. Wang, S. *et al.* *Haloterrigena daqingensis* sp. nov., an extremely haloalkaliphilic  
357 archaeon isolated from a saline-alkaline soil. *Int J Syst Evol Microbiol* **60**, 2267-2271  
358 (2010).
- 359 86. Roh, S. W. *et al.* *Haloterrigena jeotgali* sp. nov., an extremely halophilic archaeon from  
360 salt-fermented food. *Int J Syst Evol Microbiol* **59**, 2359-2363 (2009).
- 361 87. Cui, H. L., Tohty, D., Zhou, P. J. & Liu, S. J. *Haloterrigena longa* sp. nov. and  
362 *Haloterrigena limicola* sp. nov., extremely halophilic archaea isolated from a salt lake.



- 363 *Int J Syst Evol Microbiol* **56**, 1837-1840 (2006).
- 364 88. Xu, X. W., Liu, S. J., Tohty, D., Oren, A., Wu, M. & Zhou, P. J. *Haloterrigena*  
365 *saccharevitans* sp. nov., an extremely halophilic archaeon from Xin-Jiang, China. *Int J*  
366 *Syst Evol Microbiol* **55**, 2539-2542 (2005).
- 367 89. Gutierrez, M. C., Castillo, A. M., Kamekura, M. & Ventosa, A. *Haloterrigena salina*  
368 sp. nov., an extremely halophilic archaeon isolated from a salt lake. *Int J Syst Evol*  
369 *Microbiol* **58**, 2880-2884 (2008).
- 370 90. Montalvo-Rodriguez, R., Lopez-Garriga, J., Vreeland, R. H., Oren, A., Ventosa, A. &  
371 Kamekura, M. *Haloterrigena thermotolerans* sp. nov., a halophilic archaeon from  
372 Puerto Rico. *Int J Syst Evol Microbiol* **50** 1065-1071 (2000).
- 373 91. Ventosa, A. & Kamekura, M. *Haloterrigena*. In: *Bergey's Manual of Systematics of*  
374 *Archaea and Bacteria*. John Wiley & Sons, Ltd (2015).
- 375 92. Castillo, A. M. *et al.* *Halovivax ruber* sp. nov., an extremely halophilic archaeon  
376 isolated from Lake Xilinhot, Inner Mongolia, China. *Int J Syst Evol Microbiol* **57**, 1024-  
377 1027 (2007).
- 378 93. Hezayen, F. F., Rehm, B. H., Tindall, B. J. & Steinbuchel, A. Transfer of *Natrialba*  
379 *asiatica* B1<sup>T</sup> to *Natrialba taiwanensis* sp. nov. and description of *Natrialba aegyptiaca*  
380 sp. nov., a novel extremely halophilic, aerobic, non-pigmented member of the Archaea  
381 from Egypt that produces extracellular poly(glutamic acid). *Int J Syst Evol Microbiol*  
382 **51**, 1133-1142 (2001).
- 383 94. Xu, Y. *et al.* *Natrialba hulunbeirensis* sp. nov. and *Natrialba chahannaoensis* sp. nov.,  
384 novel haloalkaliphilic archaea from soda lakes in Inner Mongolia Autonomous Region,  
385 China. *Int J Syst Evol Microbiol* **51**, 1693-1698 (2001).
- 386 95. Tindall, B., Ross, H. & Grant, W. *Natronobacterium* gen. nov. and *Natronococcus* gen.  
387 nov., two new genera of haloalkaliphilic archaeobacteria. *Syst Appl Microbiol* **5**, 41-57

- 388 (1984).
- 389 96. Tapingkae, W. *et al.* *Natrinema gari* sp. nov., a halophilic archaeon isolated from fish  
390 sauce in Thailand. *Int J Syst Evol Microbiol* **58**, 2378-2383 (2008).
- 391 97. McGenity, T. J., Gemmell, R. T. & Grant, W. D. Proposal of a new halobacterial genus  
392 *Natrinema* gen. nov., with two species *Natrinema pellirubrum* nom. nov. and  
393 *Natrinema pallidum* nom. nov. *Int J Syst Bacteriol* **48 Pt 4**, 1187-1196 (1998).
- 394 98. Xin, H., Itoh, T., Zhou, P., Suzuki, K., Kamekura, M. & Nakase, T. *Natrinema*  
395 *versiforme* sp. nov., an extremely halophilic archaeon from Aibi salt lake, Xinjiang,  
396 China. *Int J Syst Evol Microbiol* **50 Pt 3**, 1297-1303 (2000).
- 397 99. Ruiz-Romero, E. *et al.* *Natronobacterium texcoconense* sp. nov., a haloalkaliphilic  
398 archaeon isolated from soil of a former lake. *Int J Syst Evol Microbiol* **63**, 4163-4166  
399 (2013).
- 400 100. Kanal, H., Kobayashi, T., Aono, R. & Kudo, T. *Natronococcus amylolyticus* sp. nov., a  
401 haloalkaliphilic archaeon. *Int J Syst Bacteriol* **45**, 762-766 (1995).
- 402 101. Roh, S. W. *et al.* *Natronococcus jeotgali* sp. nov., a halophilic archaeon isolated from  
403 shrimp jeotgal, a traditional fermented seafood from Korea *Int J Syst Evol Microbiol*  
404 **57**, 2129-2131 (2007).
- 405 102. Itoh, T., Yamaguchi, T., Zhou, P. & Takashina, T. *Natronolimnobius baerhuensis* gen.  
406 nov., sp. nov. and *Natronolimnobius innermongolicus* sp. nov., novel haloalkaliphilic  
407 archaea isolated from soda lakes in Inner Mongolia, China. *Extremophiles* **9**, 111-116  
408 (2005).
- 409 103. Xu, Y., Zhou, P. & Tian, X. Characterization of two novel haloalkaliphilic archaea  
410 *Natronorubrum bangense* gen. nov., sp. nov. and *Natronorubrum tibetense* gen. nov.,  
411 sp. nov. *Int J Syst Bacteriol*, 261-266 (1999).
- 412 104. Gutiérrez, M. C., Castillo, A. M., Corral, P., Minegishi, H. & Ventosa, A.

- 413           *Natronorubrum sediminis* sp. nov., an archaeon isolated from a saline lake. *Int J Syst*  
414           *Evol Microbiol* **60**, 1802-1806 (2010).
- 415 105. Cui, H. L., Tohty, D., Liu, H. C., Liu, S. J., Oren, A. & Zhou, P. J. *Natronorubrum*  
416           *sulfidifaciens* sp. nov., an extremely haloalkaliphilic archaeon isolated from Aiding salt  
417           lake in Xin-Jiang, China. *Int J Syst Evol Microbiol* **57**, 738-740 (2007).
- 418 106. Ruiz-Romero, E., Valenzuela-Encinas, C., Lopez-Ramirez, M. P., de los Angeles  
419           Coutino-Coutino, M., Marsch, R. & Dendooven, L. *Natronorubrum texcoconense* sp.  
420           nov., a haloalkaliphilic archaeon isolated from soil of the former lake Texcoco (Mexico).  
421           *Arch Microbiol* **195**, 145-151 (2013).
- 422
